# Supplementary material for: A Phylogeny-Regularized Sparse Regression Model for Predictive Modeling of Microbial Community Data
Source: PubMed Central journal article supplement (PMC6305753; doi:10.3389/fmicb.2018.03112), 2018-12-19
Supplement: Data_Sheet_1.pdf [file Data_Sheet_1.pdf]

# Supplementary Material: A phylogeny-regularized sparse regression model for predictive modeling of microbial community data

Jian Xiao, Li Chen\* and et al.

\*Correspondence:

Author Name: Jun Chen, Li Chen

chen.jun2@mayo.edu, li.chen@auburn.edu

## 1 DETAILS OF SIMULATING SETTINGS

### 1.1 Continuous outcome

**Scenario 1.** Set identical coefficients for all casual predictors from one cluster and the coefficients of all the other predictors to 0s. Thus we have

$$\beta_{\text{casual}}^0 = \underbrace{\{\beta_{\text{casual},1}^0, \dots, \beta_{\text{casual},12}^0\}}_{1 \text{ cluster}},$$

where  $\beta_{\text{casual},1}^0 = \dots = \beta_{\text{casual},12}^0 = \frac{6}{\sqrt{10}}$ .

**Scenario 2.** Set similar coefficients for all casual predictors from one cluster and let

$$\beta_{\text{casual}}^0 = \underbrace{\{\beta_{\text{casual},1}^0, \dots, \beta_{\text{casual},12}^0\}}_{1 \text{ cluster}},$$

where  $\beta_{\text{casual},i}^0 = \frac{4+i}{\sqrt{9}}, i = 1, 2, 3; \beta_{\text{casual},i}^0 = \frac{1+i}{\sqrt{10}}, i = 4, 5, 6; \beta_{\text{casual},i}^0 = \frac{i-2}{\sqrt{11}}, i = 7, 8, 9; \beta_{\text{casual},i}^0 = \frac{i-5}{\sqrt{12}}, i = 10, 11, 12$ , and set the coefficients of all the other predictors to 0s.

**Scenario 3.** Set identical coefficients for all the 12 predictors randomly selected from 12 different clusters. More specifically, let

$$\beta_{\text{casual}}^0 = \underbrace{\{\beta_{\text{casual},1}^0, \dots, \beta_{\text{casual},12}^0\}}_{12 \text{ clusters}},$$

where  $\beta_{\text{casual},1}^0 = \dots = \beta_{\text{casual},12}^0 = \frac{6}{\sqrt{10}}$  and set the coefficients of all the other predictors to 0s.

**Scenario 4.** Set the OTUs in one cluster to have both positive and negative effects on the outcome. Set

$$\beta_{\text{casual}}^0 = \underbrace{\{\beta_{\text{casual},1}^0, \dots, \beta_{\text{casual},12}^0\}}_{1 \text{ cluster}},$$

where  $\beta_{\text{casual},1}^0 = \dots = \beta_{\text{casual},7}^0 = \frac{6}{\sqrt{10}}$  and  $\beta_{\text{casual},8}^0 = \dots = \beta_{\text{casual},12}^0 = \frac{-6}{\sqrt{10}}$ .

We then adjust  $\sigma_\epsilon$  to achieve the desired signal strength.

## 1.2 Binary outcome

**Scenario 1.** Set identical coefficients for all casual predictors from one cluster and set the coefficients of all the other predictors to 0s. Given the signal strength  $SSM = 5.0, 50.0$  and  $100.0$ , we let

$$t = \sqrt{\frac{SSM}{\sum_{j=1}^{12} \text{var}(\mathbf{x}_{\text{casual},j}^*)}},$$

and set

$$\beta_{\text{casual}}^0 = \underbrace{\{\beta_{\text{casual},1}^0, \dots, \beta_{\text{casual},12}^0\}}_{1 \text{ cluster}},$$

where  $\beta_{\text{casual},1}^0 = \dots = \beta_{\text{casual},12}^0 = t$ .

**Scenario 2.** Set similar coefficients for all casual predictors from one cluster. Let  $w_{\text{casual},i} = \frac{\sqrt{10}}{6} \times \frac{4+i}{\sqrt{9}}, i = 1, 2, 3$ ,  $w_{\text{casual},i} = \frac{\sqrt{10}}{6} \times \frac{1+i}{\sqrt{10}}, i = 4, 5, 6$ ,  $w_{\text{casual},i} = \frac{\sqrt{10}}{6} \times \frac{i-2}{\sqrt{11}}, i = 7, 8, 9$ ,  $w_{\text{casual},i} = \frac{\sqrt{10}}{6} \times \frac{i-5}{\sqrt{12}}, i = 10, 11, 12$ , and

$$t = \sqrt{\frac{SSM}{\sum_{j=1}^{12} w_{\text{casual},j}^2 \text{var}(\mathbf{x}_{\text{casual},j}^*)}}.$$

We set the coefficients

$$\beta_{\text{casual}}^0 = \underbrace{\{\beta_{\text{casual},1}^0, \dots, \beta_{\text{casual},12}^0\}}_{1 \text{ cluster}},$$

where  $\beta_{\text{casual},i}^0 = w_i * t$  and set the coefficients of all the other predictors to 0s.

**Scenario 3.** Set identical coefficients for the 12 predictors randomly selected from 12 different clusters. Let

$$t = \sqrt{\frac{SSM}{\sum_{j=1}^{12} \text{var}(\mathbf{x}_{\text{casual},j}^*)}},$$

and set

$$\beta_{\text{casual}}^0 = \underbrace{\{\beta_{\text{casual},1}^0, \dots, \beta_{\text{casual},12}^0\}}_{12 \text{ clusters}},$$

where  $\beta_{\text{casual},1}^0 = \dots = \beta_{\text{casual},12}^0 = t$  and set the coefficients of all the other predictors to be equal to 0.

**Scenario 4.** Set that OTUs in one cluster can have both positive and negative effects on the outcome. Let

$$t = \sqrt{\frac{SSM}{\sum_{j=1}^{12} \text{var}(\mathbf{x}_{\text{casual},j}^*)}},$$

and set

$$\beta_{\text{casual}}^0 = \underbrace{\{\beta_{\text{casual},1}^0, \dots, \beta_{\text{casual},12}^0\}}_{1 \text{ cluster}},$$

where  $\beta_{casual,1}^0 = \dots = \beta_{casual,7}^0 = t$  and  $\beta_{casual,8}^0 = \dots = \beta_{casual,12}^0 = -t$ .

## 2 PROOF OF THEOREM 1

*Proof.* The SICS (sparse inverse correlation matrix shrinkage) estimator can be obtained by

$$\hat{\beta}(\alpha, \lambda_1, \lambda_2) = \arg \min_b$$

$$\left\{ \frac{1}{2n} \|y - \mathbf{X}b\|^2 + p_{\lambda_1}^{sp}(\beta) + \frac{1}{2} \lambda_2 \sum_{i=1}^p (\Omega_{ii}(\alpha) - \sum_{j=1, j \neq i}^p |\Omega_{ij}(\alpha)|) b_i^2 + \frac{1}{2} \lambda_2 \sum_{1 \leq j < k \leq p} |\Omega_{jk}(\alpha)| (b_j - s_{jk} b_k)^2, b \in R^p \right\}.$$

Then for any  $j \in V_g, g \in \{1, \dots, J\}$ , the  $j$ th estimated coefficient  $\hat{\beta}_j(\alpha, \lambda_1, \lambda_2)$  must satisfy the KKT conditions

(I) If  $\hat{\beta}_j(\alpha, \lambda_1, \lambda_2) \neq 0$ , then

$$\begin{aligned} & -\frac{1}{n} \mathbf{x}_j^T (y - \mathbf{X} \hat{\beta}(\alpha, \lambda_1, \lambda_2)) + \lambda_1 (1 - |\hat{\beta}_j(\alpha, \lambda_1, \lambda_2)| / (\gamma \lambda_1))_+ \text{sgn}(\hat{\beta}_j(\alpha, \lambda_1, \lambda_2)) \\ & + \lambda_2 (|\Omega_{g,jj}(\alpha)| \hat{\beta}_j(\alpha, \lambda_1, \lambda_2) - \sum_{k=1, k \neq j}^{v_g} \Omega_{g,jk}(\alpha) \hat{\beta}_k(\alpha, \lambda_1, \lambda_2)) = 0. \end{aligned}$$

(II) If  $\hat{\beta}_j(\alpha, \lambda_1, \lambda_2) = 0$ , then

$$\frac{1}{n} |\mathbf{x}_j^T (y - \mathbf{X} \hat{\beta}(\alpha, \lambda_1, \lambda_2)) - \lambda_2 \sum_{k=1, k \neq j}^{v_g} \Omega_{g,jk}(\alpha) \hat{\beta}_k(\alpha, \lambda_1, \lambda_2)| \leq \lambda_1.$$

Furthermore, let  $\hat{r} = y - \mathbf{X} \hat{\beta}(\alpha, \lambda_1, \lambda_2)$ ,  $\hat{z}_j = \frac{1}{n} \mathbf{x}_j^T \hat{r}$  and  $\hat{\Delta}_g = \sum_{k=1}^{v_g} \Omega_{g,jk}(\alpha) \hat{\beta}_k(\alpha, \lambda_1, \lambda_2) = \sum_{k=1}^{v_g} (-\Omega_g^0) \hat{\beta}_k(\alpha, \lambda_1, \lambda_2)$ , then (I) and (II) can be written as

(I) If  $\hat{\beta}_j(\alpha, \lambda_1, \lambda_2) \neq 0$ , then

$$\begin{aligned} & -\gamma \hat{z}_j + (\lambda_1 \gamma - |\hat{\beta}_j(\alpha, \lambda_1, \lambda_2)|)_+ \text{sgn}(\hat{\beta}_j(\alpha, \lambda_1, \lambda_2)) \\ & + \lambda_2 \gamma (2\kappa_g (v_g - 1) \Omega_g^0 \hat{\beta}_j(\alpha, \lambda_1, \lambda_2) - \hat{\Delta}_g) = 0. \end{aligned}$$

(II) If  $\hat{\beta}_j(\alpha, \lambda_1, \lambda_2) = 0$ , then  $|\hat{z}_j - \lambda_2 \hat{\Delta}_g| \leq \lambda_1$ .

After some algebra, when  $2\lambda_2 \gamma \kappa_g (v_g - 1) \Omega_g^0 > 1$ , we have

$$\hat{\beta}_j(\alpha, \lambda_1, \lambda_2) = \begin{cases} 0, & \text{if } |\hat{z}_j - \lambda_2 \hat{\Delta}_g| \leq \lambda_1. \\ \text{sgn}(\hat{z}_j - \lambda_2 \hat{\Delta}_g) \left| \frac{\gamma (|\hat{z}_j - \lambda_2 \hat{\Delta}_g| - \lambda_1)}{2\lambda_2 \gamma \kappa_g (v_g - 1) \Omega_g^0 - 1} \right|, & \text{if } \lambda_1 < |\hat{z}_j - \lambda_2 \hat{\Delta}_g| < 2\lambda_2 \gamma \kappa_g (v_g - 1) \Omega_g^0, \\ (2\lambda_2 \gamma \kappa_g (v_g - 1) \Omega_g^0)^{-1} (\hat{z}_j - \lambda_2 \hat{\Delta}_g), & \text{if } |\hat{z}_j - \lambda_2 \hat{\Delta}_g| \geq 2\lambda_2 \gamma \kappa_g (v_g - 1) \Omega_g^0, \end{cases}$$

and when  $2\lambda_2\gamma\kappa_g(v_g - 1)\Omega_g^0 \leq 1$ , we have

$$\hat{\beta}_j(\alpha, \lambda_1, \lambda_2) = \begin{cases} 0, & \text{if } |\hat{z}_j - \lambda_2\hat{\Delta}_g| \leq \lambda_1. \\ (2\lambda_2\gamma\kappa_g(v_g - 1)\Omega_g^0)^{-1}(\hat{z}_j - \lambda_2\hat{\Delta}_g), & \text{if } |\hat{z}_j - \lambda_2\hat{\Delta}_g| \geq 2\lambda_1\lambda_2\gamma\kappa_g(v_g - 1)\Omega_g^0. \end{cases}$$

First, suppose that feature  $j$  and feature  $k$  are positively correlated. Based on the above expressions, we can show that

$$|\hat{\beta}_j(\alpha, \lambda_1, \lambda_2) - \hat{\beta}_k(\alpha, \lambda_1, \lambda_2)| \leq \xi|\hat{z}_j - \hat{z}_k|,$$

where

$$\xi = \begin{cases} \max \{2\gamma(2\gamma\lambda_2\kappa_g(v_g - 1)\Omega_g^0 - 1)^{-1}, \frac{2\gamma\lambda_2\kappa_g(v_g - 1)\Omega_g^0 + 1}{2\lambda_2\kappa_g(v_g - 1)\Omega_g^0(2\gamma\lambda_2\kappa_g(v_g - 1)\Omega_g^0 - 1)}, (2\lambda_2\kappa_g(v_g - 1)\Omega_g^0)^{-1}\}, & \text{if } 2\gamma\lambda_2\kappa_g(v_g - 1)\Omega_g^0 > 1, \\ 2\lambda_2\kappa_g(v_g - 1)\Omega_g^0^{-1}, & \text{if } 2\gamma\lambda_2\kappa_g(v_g - 1)\Omega_g^0 \leq 1. \end{cases}$$

By the Cauchy-Schwarz inequality,  $|\hat{z}_j - \hat{z}_k| \leq \frac{\|y\|_1}{\sqrt{n}} \sqrt{2(1 - \rho_{jk})}$ . So we finally get

$$|\hat{\beta}_j(\alpha, \lambda_1, \lambda_2) - \hat{\beta}_k(\alpha, \lambda_1, \lambda_2)| \leq \frac{\xi\|y\|_1}{\sqrt{n}} \sqrt{2(1 - \rho_{jk})}.$$

For negative  $\rho_{jk}$ , we only need to change the sign of  $\hat{z}_k$  and use the same argument. Especially, if  $\rho_{jk} = 0$ , we have  $|\hat{\beta}_j(\alpha, \lambda_1, \lambda_2) - \hat{\beta}_k(\alpha, \lambda_1, \lambda_2)| \leq \frac{\sqrt{2}\xi\|y\|_1}{\sqrt{n}}$ .

### 3 SUPPLEMENTARY FIGURES

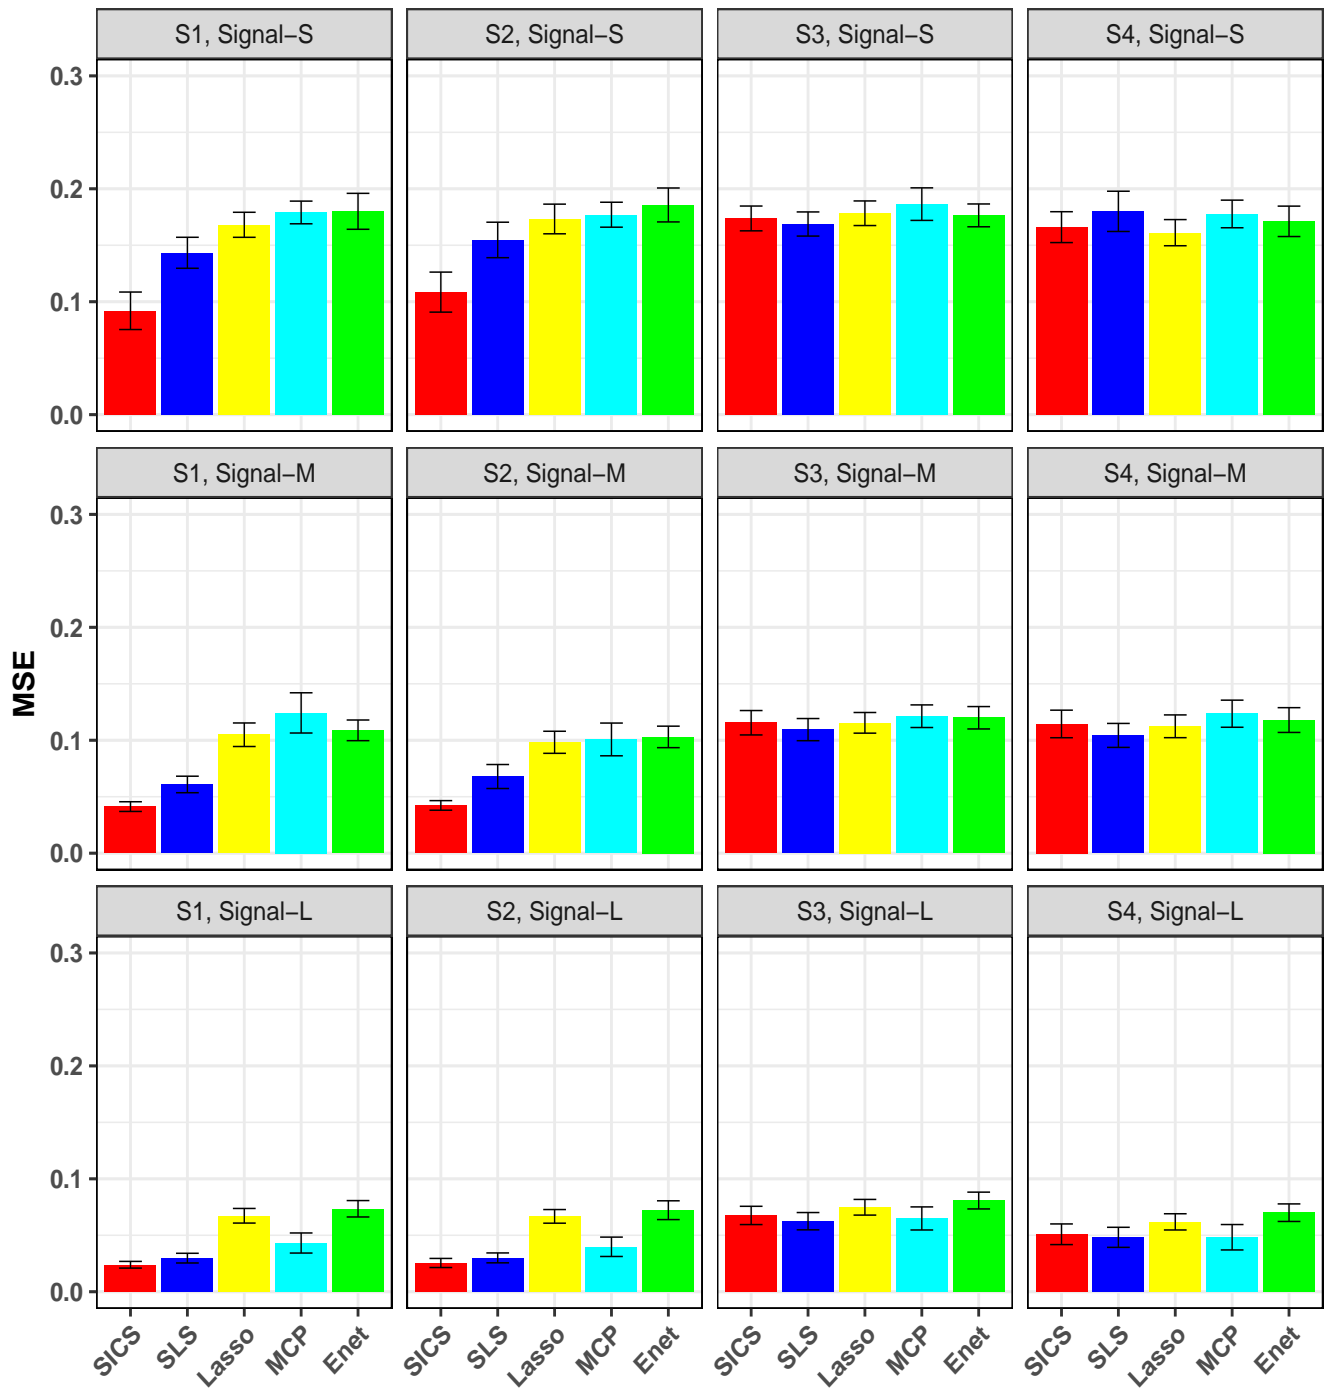

**Figure S1.** Model estimation performance (MSE) for simulated continuous-outcome data. S1, S2: phylogeny-informative scenarios, and S3, S4: phylogeny-non-informative scenarios; Signal-S, -M, and -L represent weak, medium and strong signals, respectively.

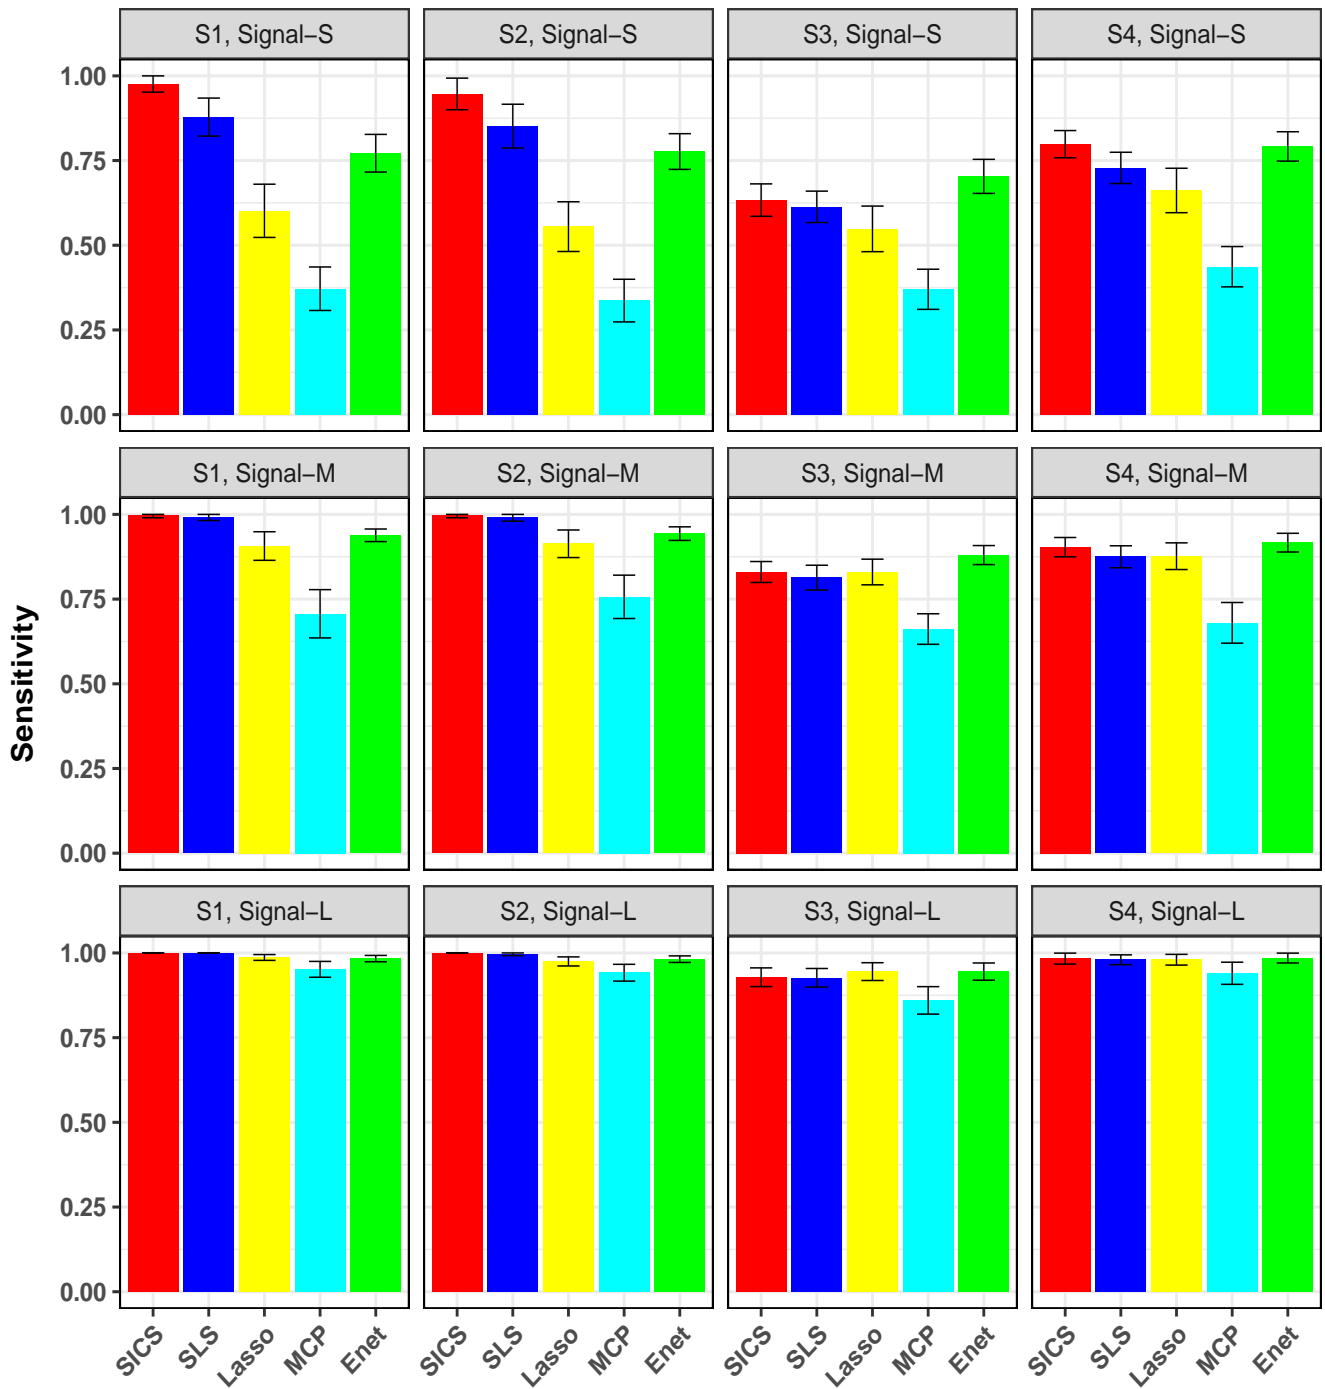

**Figure S2.** Variable selection performance (Sensitivity) for simulated continuous-outcome data. S1, S2: phylogeny-informative scenarios, and S3, S4: phylogeny-non-informative scenarios; Signal-S, -M, and -L represent weak, medium and strong signals, respectively.

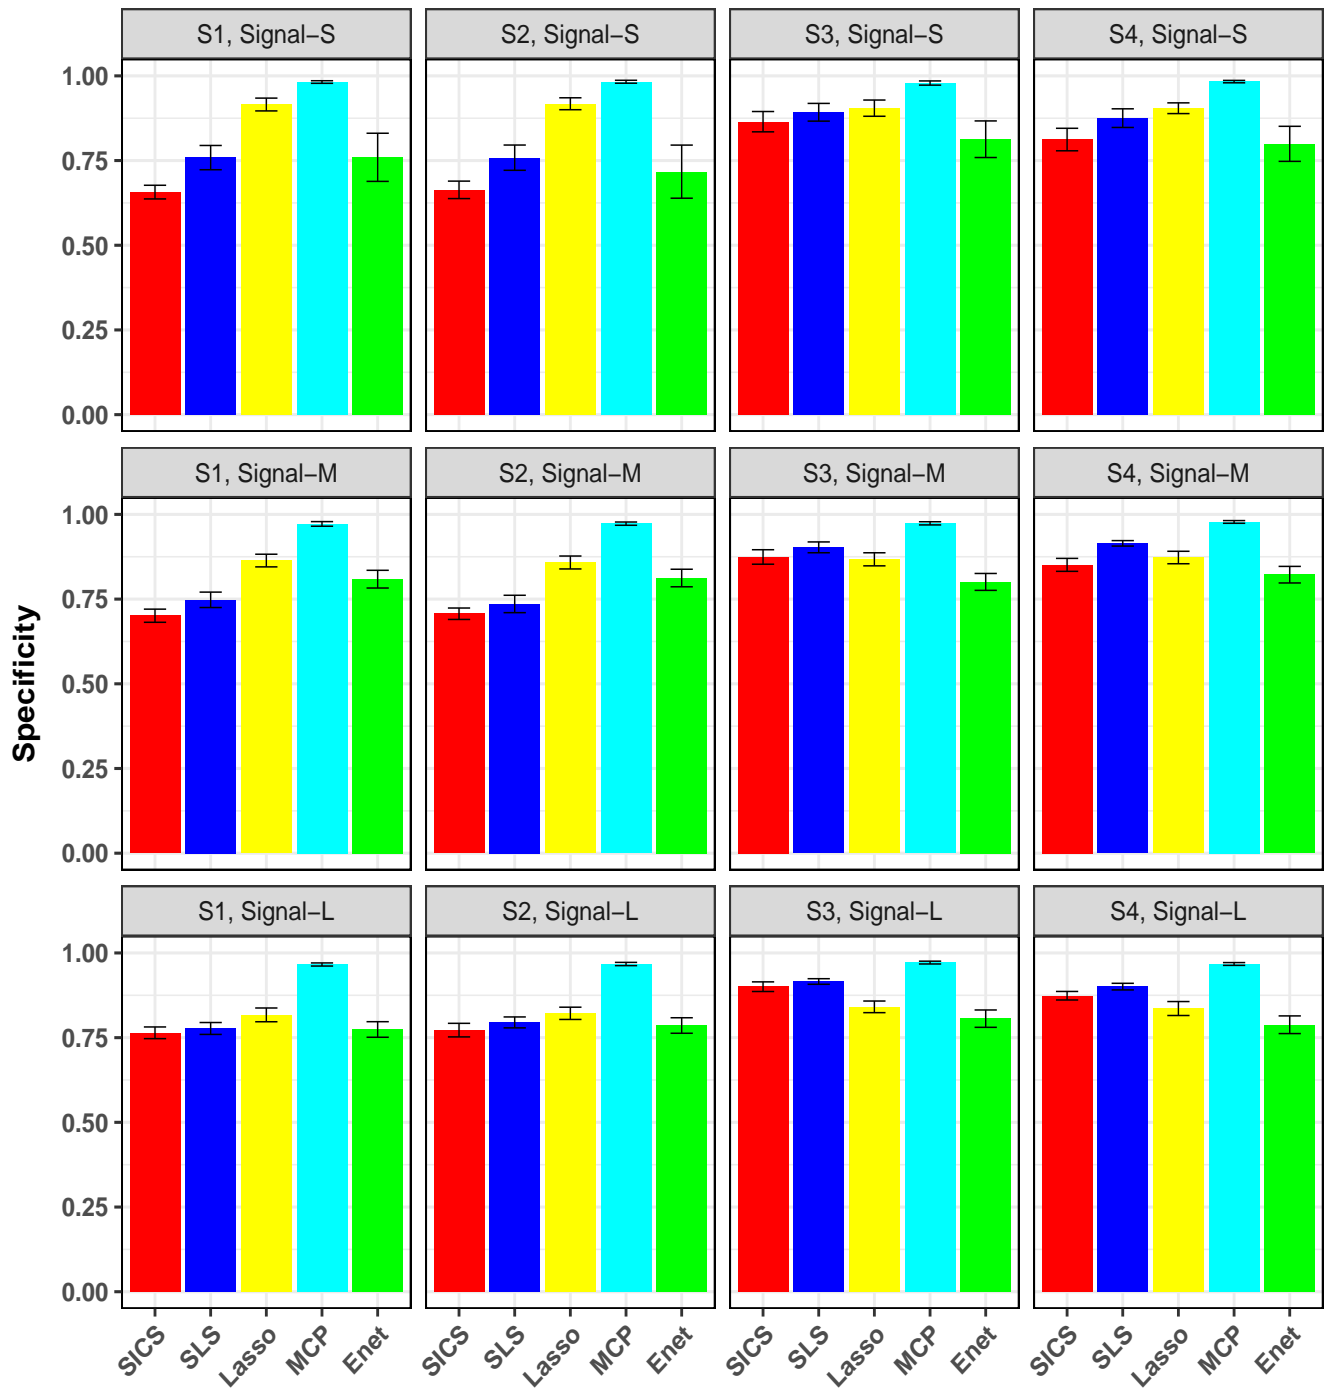

**Figure S3.** Variable selection performance (Specificity) for simulated continuous-outcome data. S1, S2: phylogeny-informative scenarios, and S3, S4: phylogeny-non-informative scenarios; Signal-S, -M, and -L represent weak, medium and strong signals, respectively.

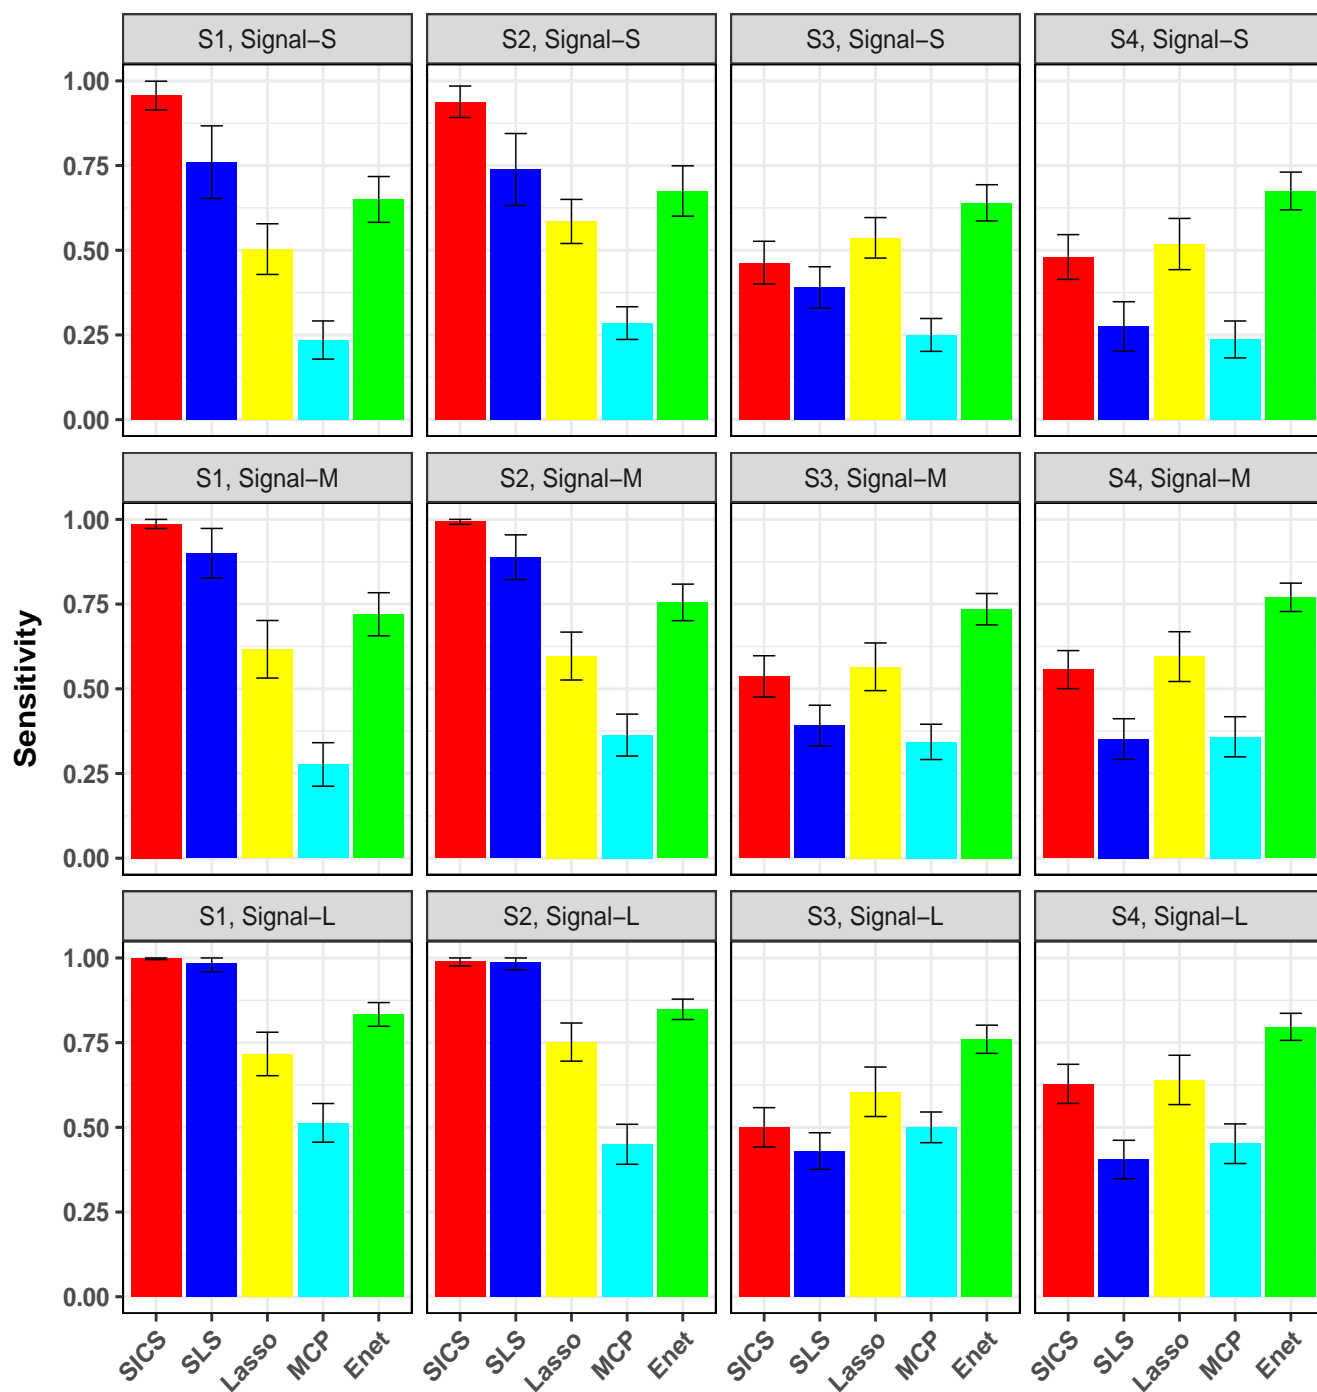

**Figure S4.** Variable selection performance (Sensitivity) for simulated binary-outcome data. S1, S2: phylogeny-informative scenarios, and S3, S4: phylogeny-non-informative scenarios; Signal-S, -M, and -L represent weak, medium and strong signals, respectively.



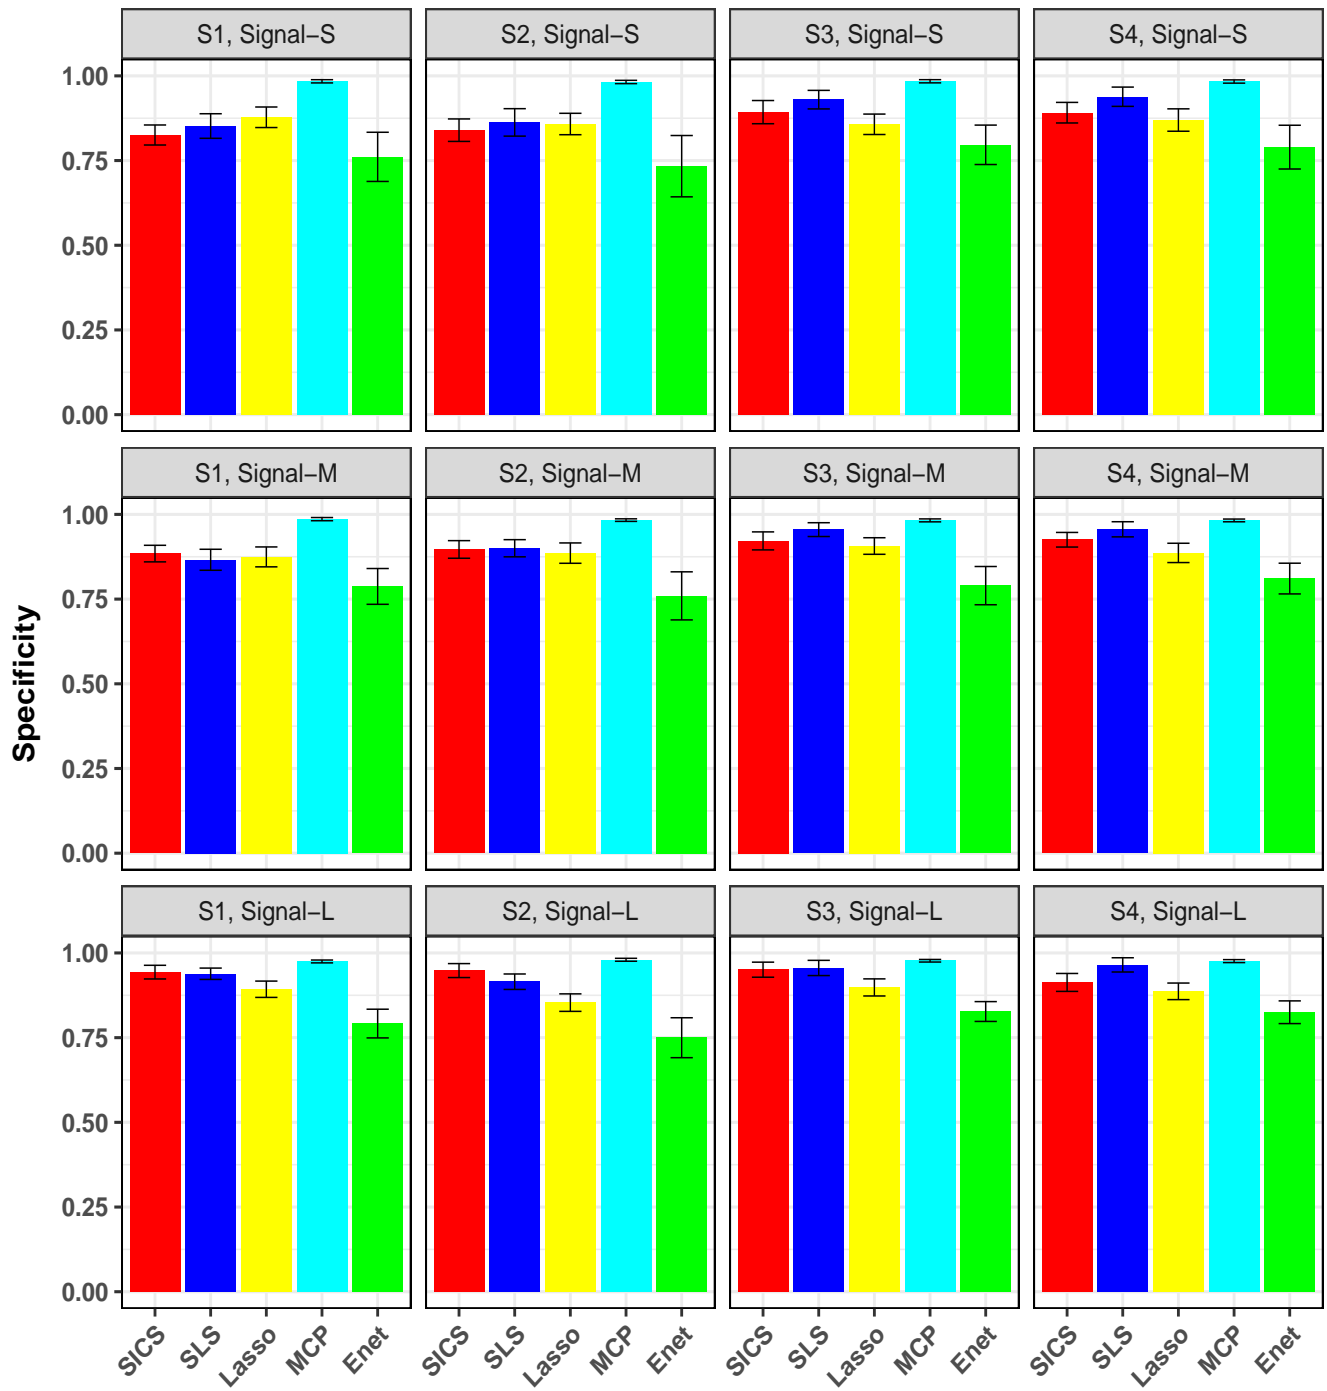

**Figure S5.** Variable selection performance (Specificity) for simulated continuous-outcome data. S1, S2: phylogeny-informative scenarios, and S3, S4: phylogeny-non-informative scenarios; Signal-S, -M, and -L represent weak, medium and strong signals, respectively.

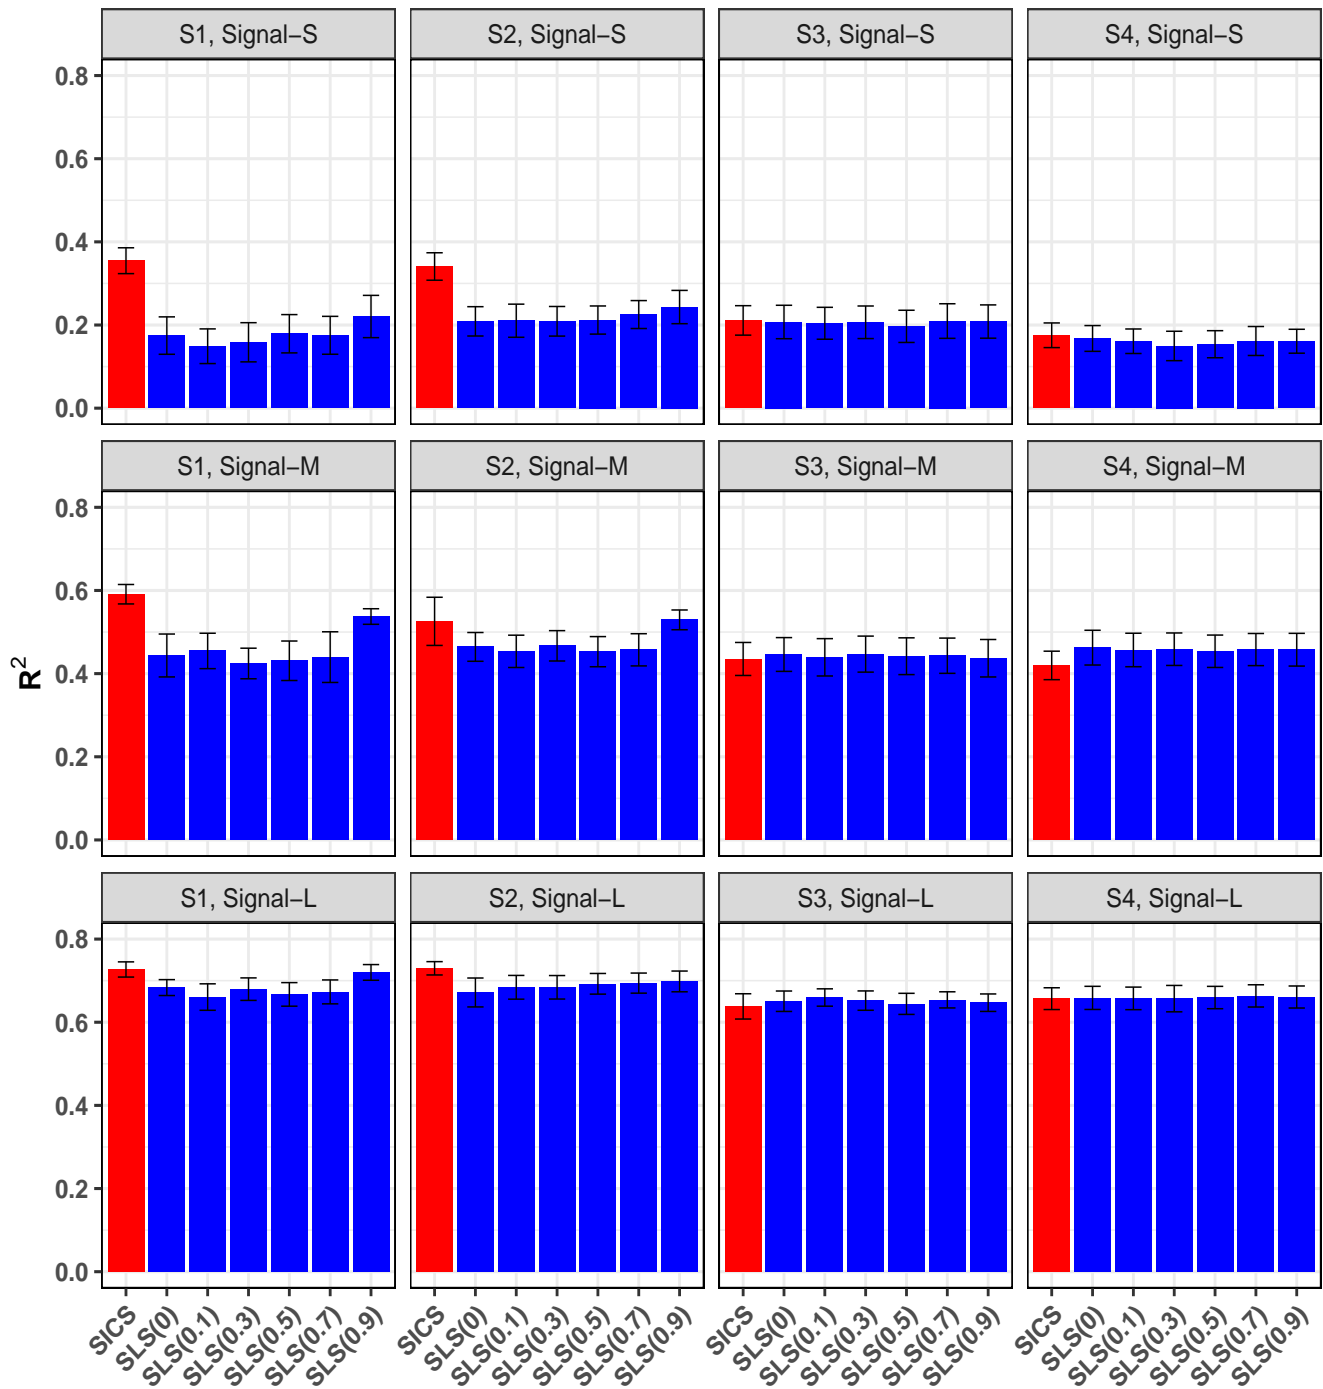

**Figure S6.** Comparison of SICS to SLS with different sparsity levels in the Laplacian matrix for continuous-outcome data.  $R^2$  was used for evaluating the performance. S1, S2: phylogeny-informative scenarios, and S3, S4: phylogeny-non-informative scenarios; Signal-S, -M, and -L represent weak, medium and strong signals, respectively.

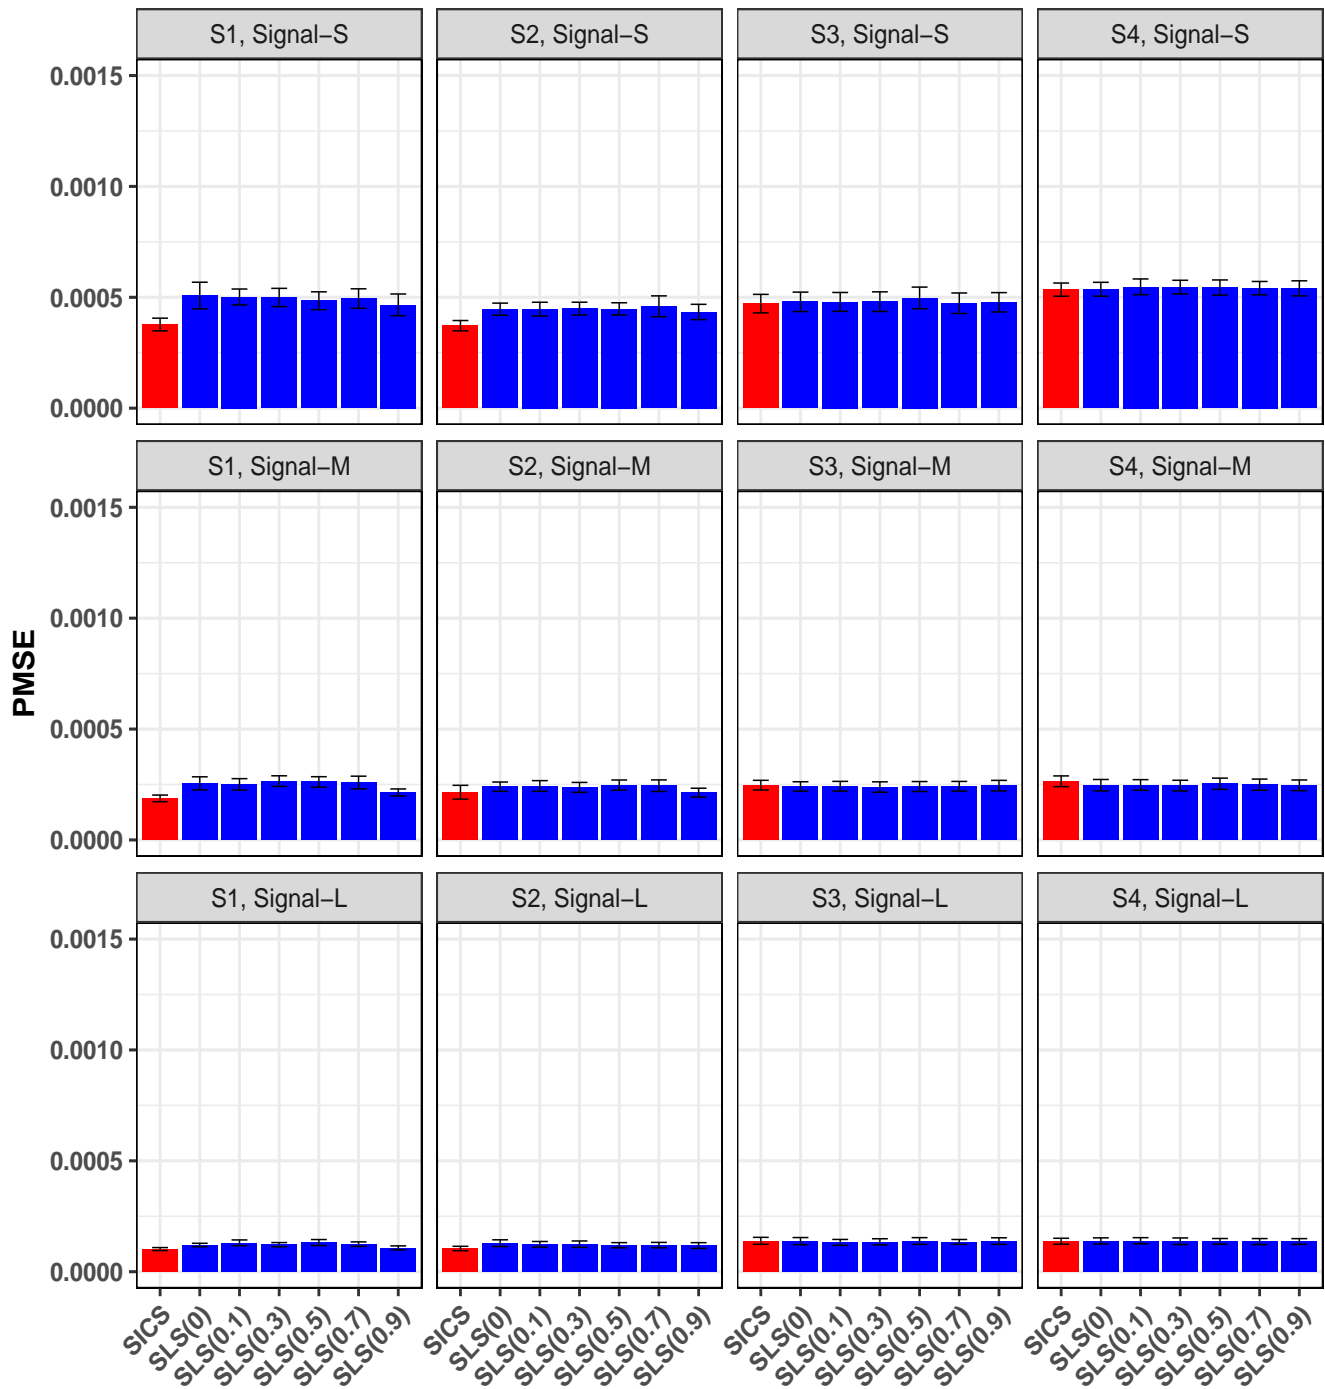

**Figure S7.** Comparison of SICS to SLS with different sparsity levels in the Laplacian matrix for continuous-outcome data. PMSE was used for evaluating the performance. S1, S2: phylogeny-informative scenarios, and S3, S4: phylogeny-non-informative scenarios; Signal-S, -M, and -L represent weak, medium and strong signals, respectively.

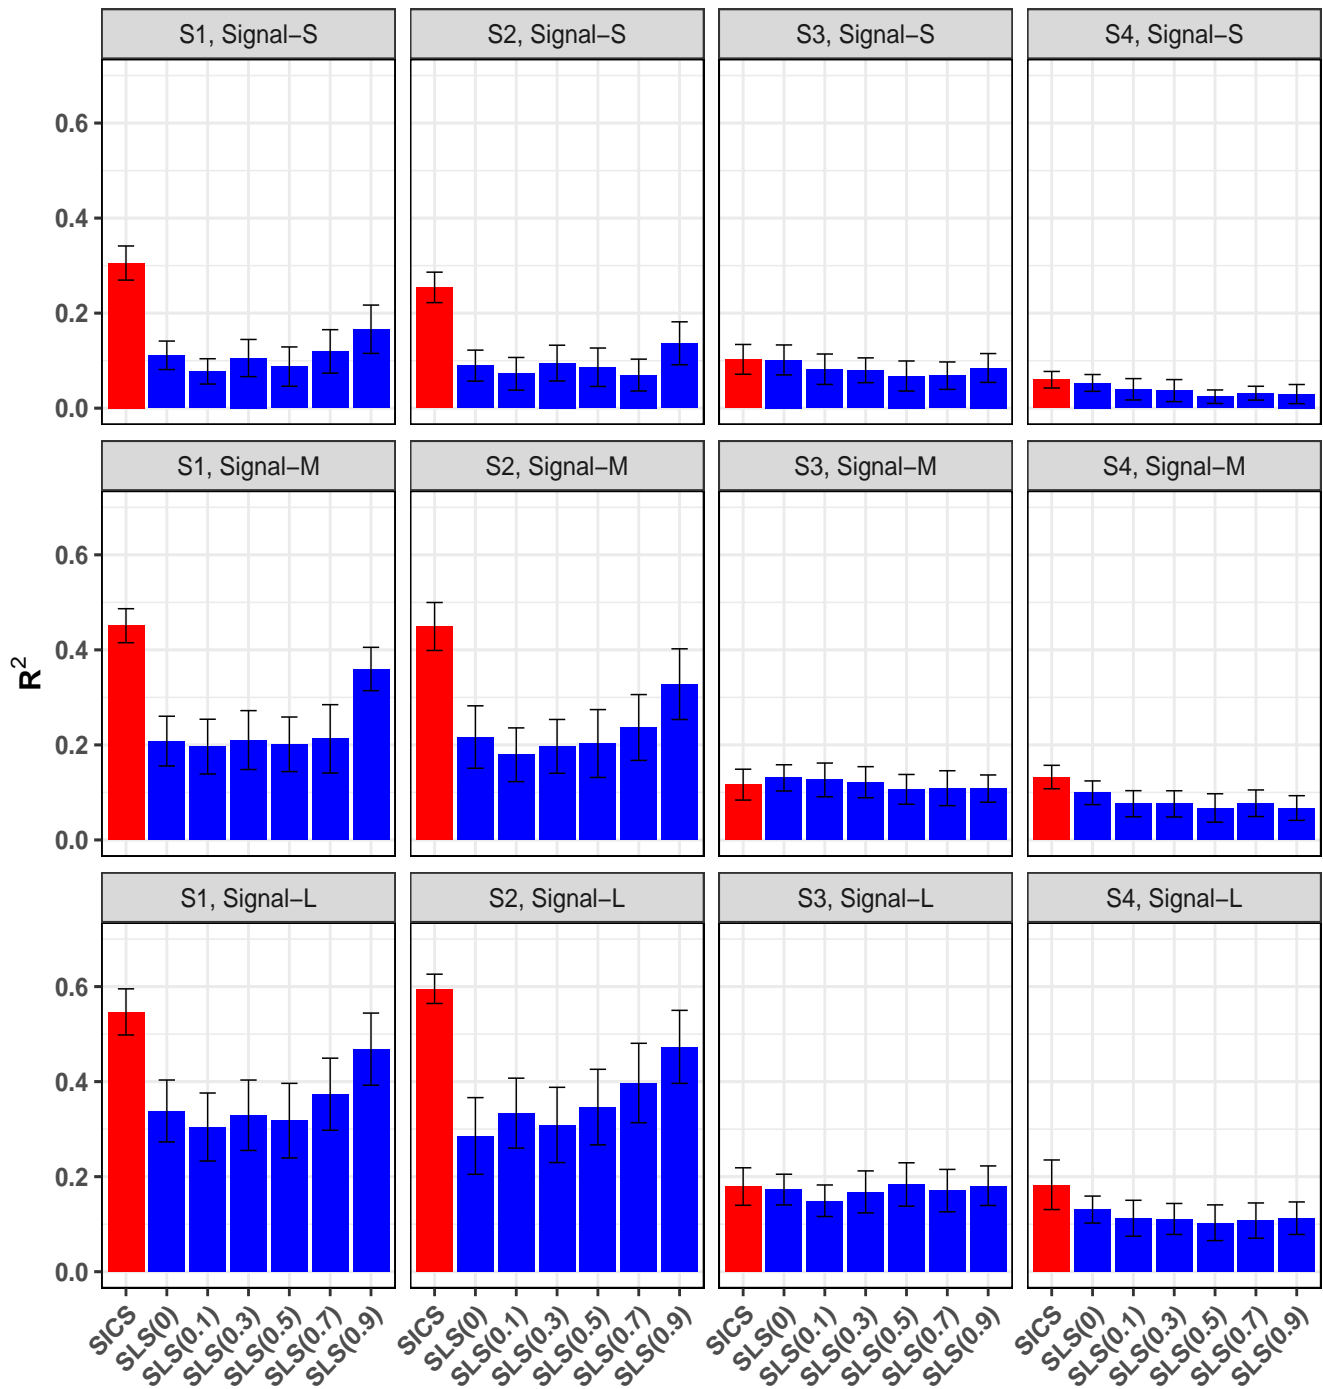

**Figure S8.** Comparison of SICS to SLS with different sparsity levels in the Laplacian matrix for binary-outcome data.  $R^2$  was used for evaluating the performance. S1, S2: phylogeny-informative scenarios, and S3, S4: phylogeny-non-informative scenarios; Signal-S, -M, and -L represent weak, medium and strong signals, respectively.

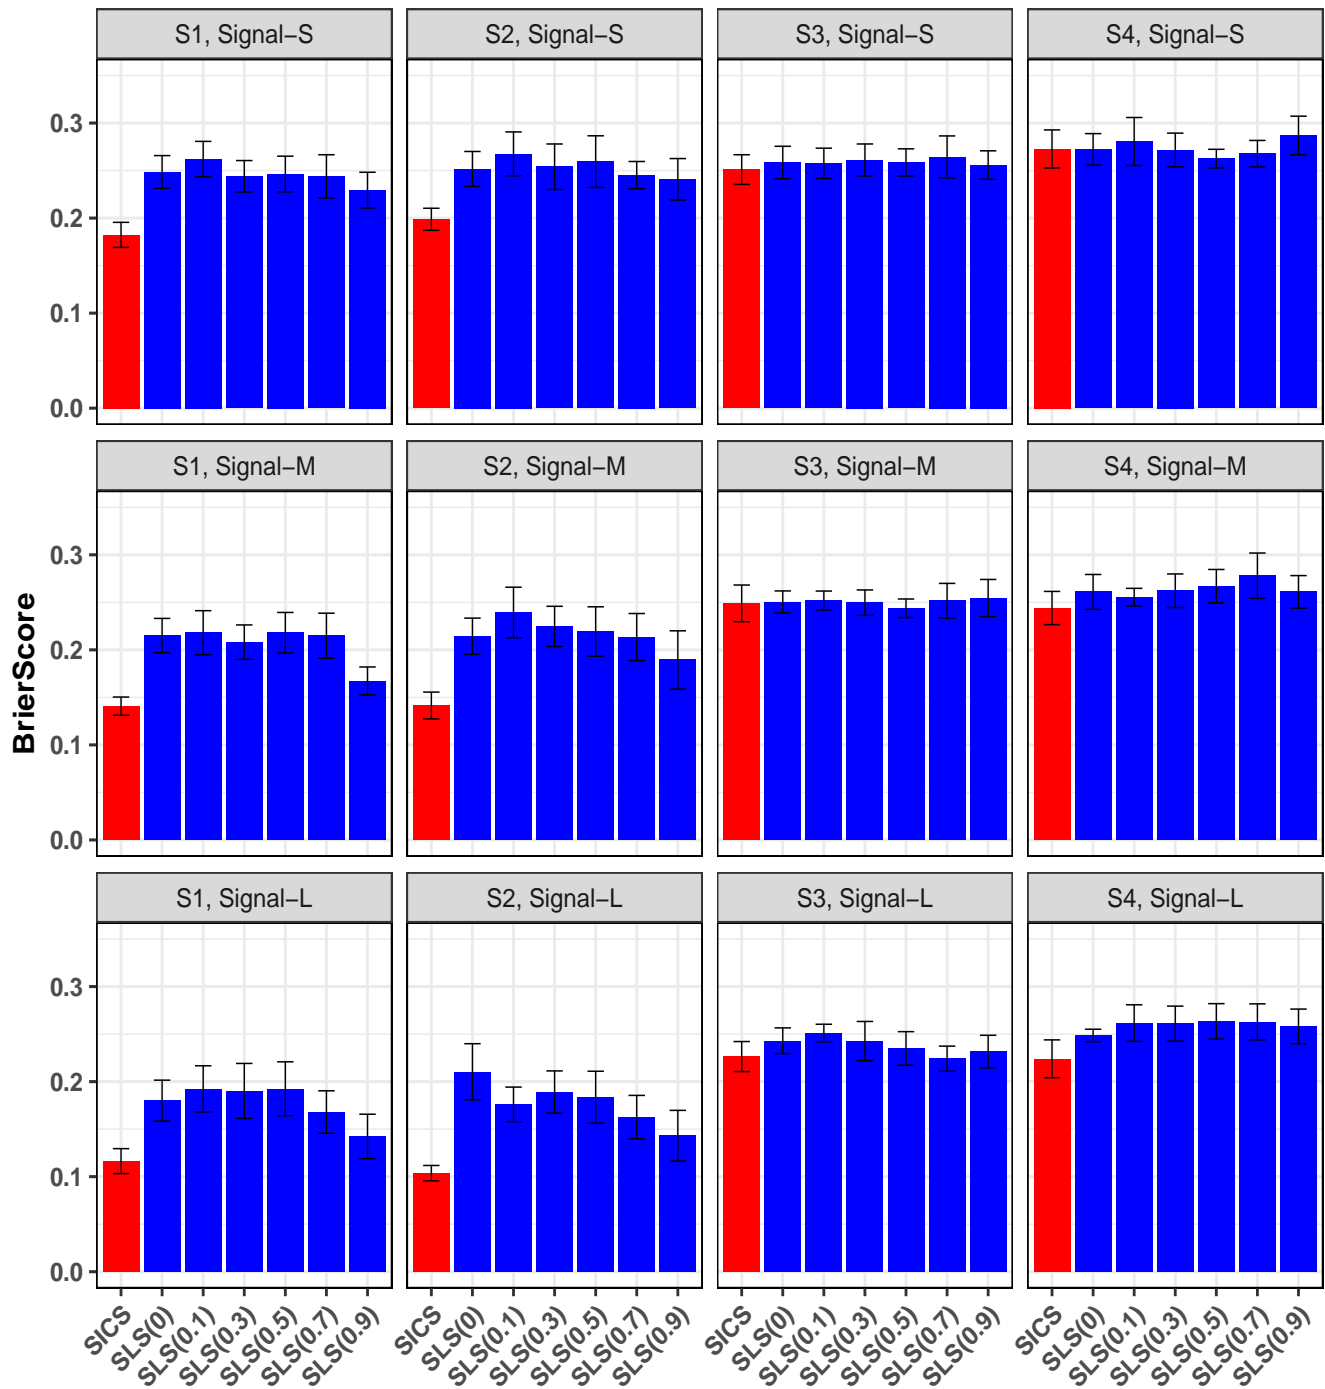

**Figure S9.** Comparison of SICS to SLS with different sparsity levels in the Laplacian matrix for binary-outcome data. Brier score was used for evaluating the performance. S1, S2: phylogeny-informative scenarios, and S3, S4: phylogeny-non-informative scenarios; Signal-S, -M, and -L represent weak, medium and strong signals, respectively.
